# 1 **Single-cell analysis of chromatin silencing programs in development** 2 **and tumor progression**

3

Steven J. Wu<sup>1,5,\*</sup>, Scott N. Furlan<sup>2,8\*</sup>, Anca B. Mihalas<sup>3,7</sup>, Hatice S. Kaya-Okur<sup>1,6,10</sup>, Abdullah H. Feroze<sup>7</sup>, Samuel N. Emerson<sup>7</sup>, Ye Zheng<sup>4</sup>, Kalee Carson<sup>2</sup>, Patrick J. Cimino<sup>3,9</sup>, C. Dirk Keene<sup>9</sup>, Jay F. Sarthy<sup>2,8</sup>, Raphael Gottardo<sup>4</sup>, Kami Ahmad<sup>1</sup>, Steven Henikoff<sup>1,6,\*\*</sup>, & Anoop P. Patel<sup>3,7\*\*</sup>

<sup>1</sup>Basic Sciences Division, <sup>2</sup>Clinical Research Division, <sup>3</sup>Human Biology Division, <sup>4</sup>Vaccine and Infectious Disease Division, Fred Hutchinson Cancer Research Center, Seattle, USA. <sup>5</sup>Molecular Engineering & Sciences Institute, University of Washington, Seattle, USA. <sup>6</sup>Howard Hughes Medical Institute. <sup>10</sup>Altius Institute for Biomedical Sciences, Seattle, USA. Departments of <sup>7</sup>Neurological Surgery, <sup>8</sup>Pediatrics, and Laboratory Medicine and Pathology<sup>9</sup>, University of Washington, Seattle, USA. \* Contributed equally; \*\*Contributed equally; Correspondence: [apatel1@uw.edu](mailto:apatel1@uw.edu), [steveh@fredhutch.org](mailto:steveh@fredhutch.org)

4

5 Single-cell analysis has become a powerful approach for the molecular characterization of  
6 complex tissues. Methods for quantifying gene expression<sup>1</sup> and chromatin accessibility<sup>2</sup> of  
7 single cells are now well-established, but analysis of chromatin regions with specific histone  
8 modifications has been technically challenging. Here, we adapt the recently published  
9 CUT&Tag method<sup>3</sup> to scalable single-cell platforms to profile chromatin landscapes in single  
10 cells (scCUT&Tag) from complex tissues. We focus on profiling Polycomb Group (PcG)  
11 silenced regions marked by H3K27 trimethylation (H3K27me3) in single cells as an orthogonal  
12 approach to chromatin accessibility for identifying cell states. We show that scCUT&Tag  
13 profiling of H3K27me3 distinguishes cell types in human blood and allows the generation of  
14 cell-type-specific PcG landscapes from heterogeneous tissues. Furthermore, we use  
15 scCUT&Tag to profile H3K27me3 in a brain tumor patient before and after treatment,  
16 identifying cell types in the tumor microenvironment and heterogeneity in PcG activity in the  
17 primary sample and after treatment.

18

19 Significant portions of the genome are actively repressed to create barriers between cell type  
20 lineages during development<sup>4</sup>. In particular, trimethylation on lysine 27 of histone H3  
21 (H3K27me3) in nucleosomes by PcG proteins is crucial for gene silencing during normal  
22 differentiation and thus for maintaining cell identity<sup>5</sup>. Conversely, derangements in PcG silencing  
23 permit aberrant gene expression and disease<sup>6</sup>. Therefore, methods for assaying silenced  
24 chromatin can provide insights into a variety of processes ranging from normal development to  
25 tumorigenesis.

26 Scalable methods for assessing silenced chromatin at the single-cell level have not been widely  
27 available. We set out to use chromatin profiling of single cells to assess gene silencing and to  
28 develop a framework for analysis. Our approach builds on Cleavage Under Targets and  
29 Tagmentation (CUT&Tag), which uses specific antibodies to tether a Tn5 transposome at the  
30 sites of chromatin proteins in isolated cells or nuclei. Activation of the transposome then  
31 tagments genomic loci with adapter sequences that are used for library construction and deep  
32 sequencing, thereby identifying binding sites for any protein where a specific antibody is  
33 available<sup>3</sup>. Our earlier work demonstrated that CUT&Tag profiling of the H3K4me2 histone  
34 modification efficiently detected gene activity, much like ATAC-seq, while H3K27me3 profiling  
35 detected silenced chromatin that may be epigenetically inherited<sup>3</sup>.

36 To determine whether single-cell chromatin landscapes were sufficient to distinguish different  
37 cell types, we performed CUT&Tag on H1 human embryonic stem cells (H1 hESCs) using an  
38 anti-H3K27me3-specific antibody in bulk and then distributed single cells for PCR and library  
39 enrichment on the ICELL8 system (Fig. 1a). We compared this to previously published  
40 H3K27me3 scCUT&Tag profiles of K562 cells and hESC<sup>3</sup> to determine whether standard  
41 approaches to single-cell clustering could distinguish cell types based on H3K27me3 signal. As  
42 PcG domains typically span >10 kilobases, we grouped read counts in 5 kilobase bins across  
43 the genome and used this for latent semantic indexing (LSI) based dimensional reduction and  
44 UMAP embedding, followed by standard Louvain clustering using the ArchR package<sup>7</sup> (see  
45 methods). After quality control filtering (see methods, Supplementary Fig. 1a-g), UMAP  
46 embedding clearly separated 100% of 804 hESC cells with a median of 375 unique fragments  
47 from 908 K562 cells with a median of 6064 unique fragments independent of batch effects (Fig.  
48 1b). Interestingly, hESC had 6% of the number of unique fragments when compared to K562  
49 cells (Supplementary Fig. 1f). This demonstrates that stem cells have lower global H3K27me3  
50 levels than more differentiated cell types<sup>8</sup>. Despite down-sampling the number of unique  
51 fragments per cell to the same median value for both datasets, H3K27me3 signal still readily  
52 distinguished the two cell types (Supplementary Fig. 1g) confirming that clustering was driven  
53 by differences in H3K27me3 signal and not number of unique fragments.

54 Cellular determination and differentiation proceed by a controlled sequence of gene activation  
55 and gene repression. To study gene silencing during development, we differentiated hESCs  
56 towards definitive endoderm<sup>9</sup>. We confirmed differentiation by immunofluorescence staining of  
57 stage-specific transcription factors (Supplementary Fig. 2a). UMAP embedding of 1830

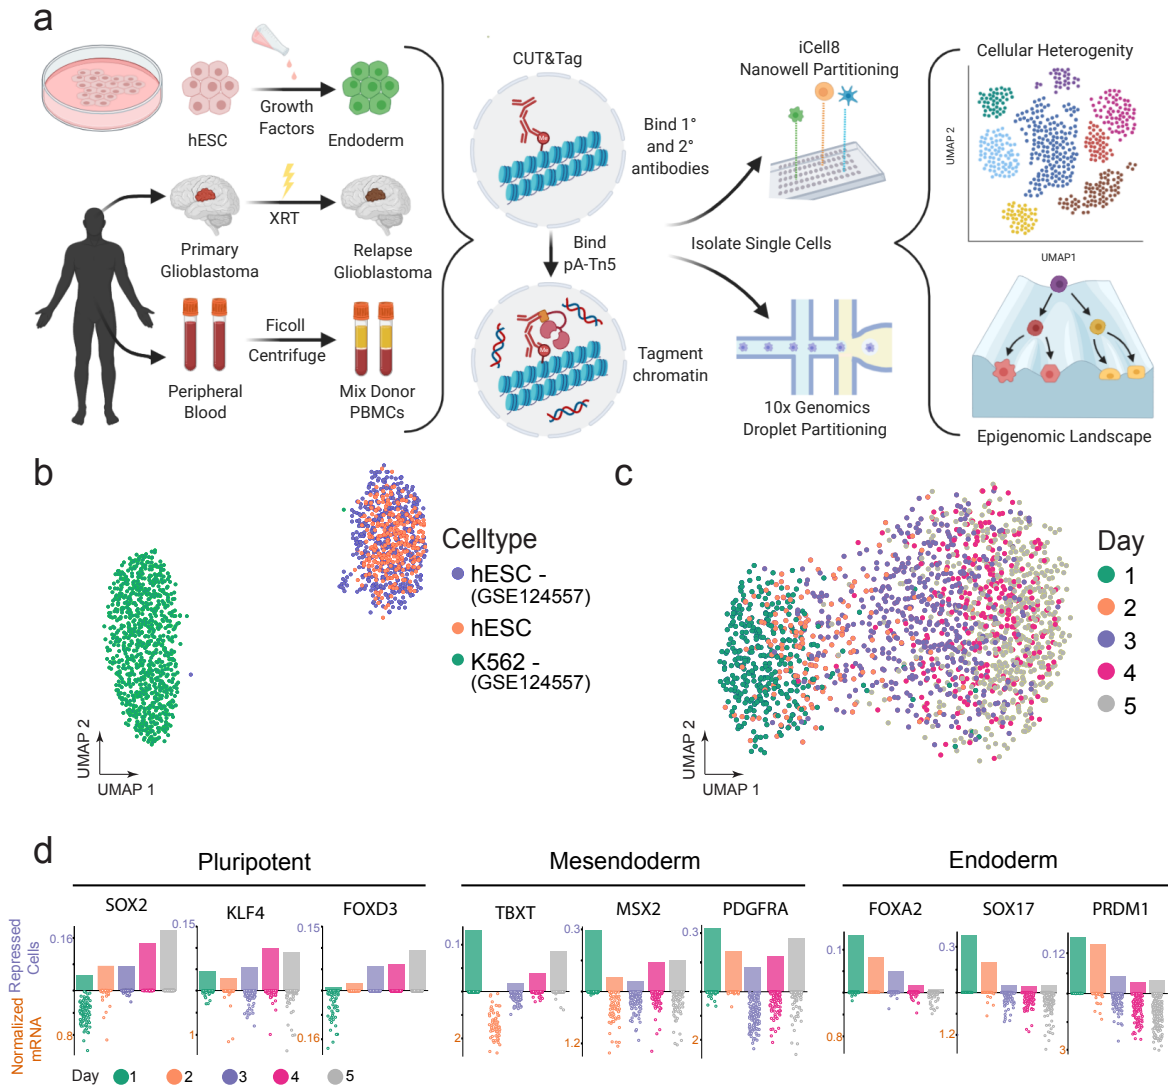

**Figure 1: Single-Cell CUT&Tag resolves distinct cell-types and maps repressive chromatin domains in early hESC development.**  
a) Schematic of scCUT&Tag applied to nuclei isolated from cell culture, a model endoderm differentiation system, blood cells, and a human brain tumor. Single cells are then partitioned using either the 10X Genomic or iCELL8 microfluidic systems. b) UMAP embedding of scCUT&Tag for a repressive histone modification, H3K27me3, in K562 (n=908) and hESC (n=804) single cells. c) UMAP embedding of scCUT&Tag for a repressive histone modification, H3K27me3, in a 5 day differentiation time course from hESC to definitive endoderm (total n=1830). Cell types are colored according to the day along the time course in which they were harvested. d) A bar plot representing the percent of single cells that are repressed at each specific gene. The jitters below depict scRNA-seq for the same timepoint. The upper axis corresponds to scCUT&Tag (percent of single cells repressed) and lower axis corresponds to scRNA-seq (normalized mRNA counts). From left to right, well-known TF markers for pluripotent, mesendoderm, and definitive endoderm cells.

58

59 scCUT&Tag H3K27me3 profiles with a median of 279 fragments revealed a developmental  
60 trajectory, independent of batch effect (Supplementary Fig. 2b), from hESC to definitive  
61 endoderm (Fig. 1c) that was punctuated by stem-like states on days 1-2 followed by a rapid  
62 progression towards differentiation on days 3-5. To determine if changes in chromatin silencing  
63 corresponded to changes in gene expression, we examined known markers of stem cells and  
64 endoderm differentiation in single-cell aggregate profiles from each day. Overall, H3K27me3  
65 signal at a marker gene was inversely correlated with expression based on a published scRNA-

66 seq dataset<sup>9</sup>. Stem cell markers such as SOX2, KLF4, and FOXD3 are expressed in hESCs and  
67 lack H3K27me3 but are silenced as differentiation proceeds (Fig. 1d). Between day 2 and 3,  
68 hESCs transition into a mesendoderm state (characterized by expression of TBXT, MSX2, and  
69 PDGFRA) in which they have the developmental potential to either become mesoderm or  
70 endoderm<sup>9</sup>. This is illustrated in our data between day 2-3 where chromatin silencing at  
71 mesoderm markers is lower (Fig. 1d). As differentiation proceeds, endoderm markers such as  
72 FOXA2, SOX17, and PRDM1 become active and lose H3K27me3 signal (Fig. 1d). Finally,  
73 markers of ectoderm (PAX6 and LHX2), are not expressed, and accumulated H3K27me3,  
74 consistent with silencing of these loci (Supplementary Fig. 2c). Pseudo-temporal ordering of  
75 single cells recapitulated our real-time results (Supplementary Fig. 2d).

76 Having established that scCUT&Tag readily identifies dynamic changes in chromatin silencing,  
77 we next sought to determine whether chromatin profiles could distinguish cell types in a more  
78 complex tissue. To do so, we adapted scCUT&Tag to the 10X Genomics microfluidics platform  
79 and profiled H3K27me3 in mixed peripheral blood mononuclear cells (PBMCs) collected from  
80 two healthy donors. Briefly, we performed scCUT&Tag in bulk on 1 million cells and then loaded  
81 two lanes of a 10X Genomics microfluidic chip with 10,000 nuclei each to obtain technical  
82 replicates (Supplementary Fig. 3). We implemented a ‘chromatin silencing score’ (CSS), which  
83 uses the gene activity score (GAS) model in ArchR<sup>7</sup> to create a proxy for the overall signal  
84 associated with a given locus. Quality control filtering resulted in 9,917 cells with a median of  
85 1,110 unique fragments per cell for which we performed dimensionality reduction and  
86 embedding as described above (Fig. 2a). The median number of reads falls in the range  
87 expected for cell type variation, in spite of the platform differences in our study.

88 We then set out to identify the major cell types in the data using two methods. We first down-  
89 sampled publicly available bulk H3K27me3 ChIP-seq data (ENCODE) and used the UMAP  
90 transform function to “project” the ChIP-seq data onto our UMAP embedding as previously  
91 described<sup>10</sup> (Fig. 2a). We used the CSS score to identify cell-type specific marker genes that  
92 showed a lack of H3K27me3 enrichment because active genes will have a low CSS. Therefore,  
93 we would expect a low CSS for a cell type specific marker gene in the cluster that corresponded  
94 to that cell type (Fig. 2b). Overall, cluster identification by CSS annotation matched our  
95 assignments by ChIP-seq projection (Fig. 2a) and distinguished major cell types in unsorted  
96 PBMCs including those of lymphoid (T cell, NK cell, B cell) and myeloid lineages (monocyte).  
97 We recovered the proportions of major cell types within the range of normal adult blood

98 (Supplementary Table 1). Using this method, we can therefore generate cell type specific PcG

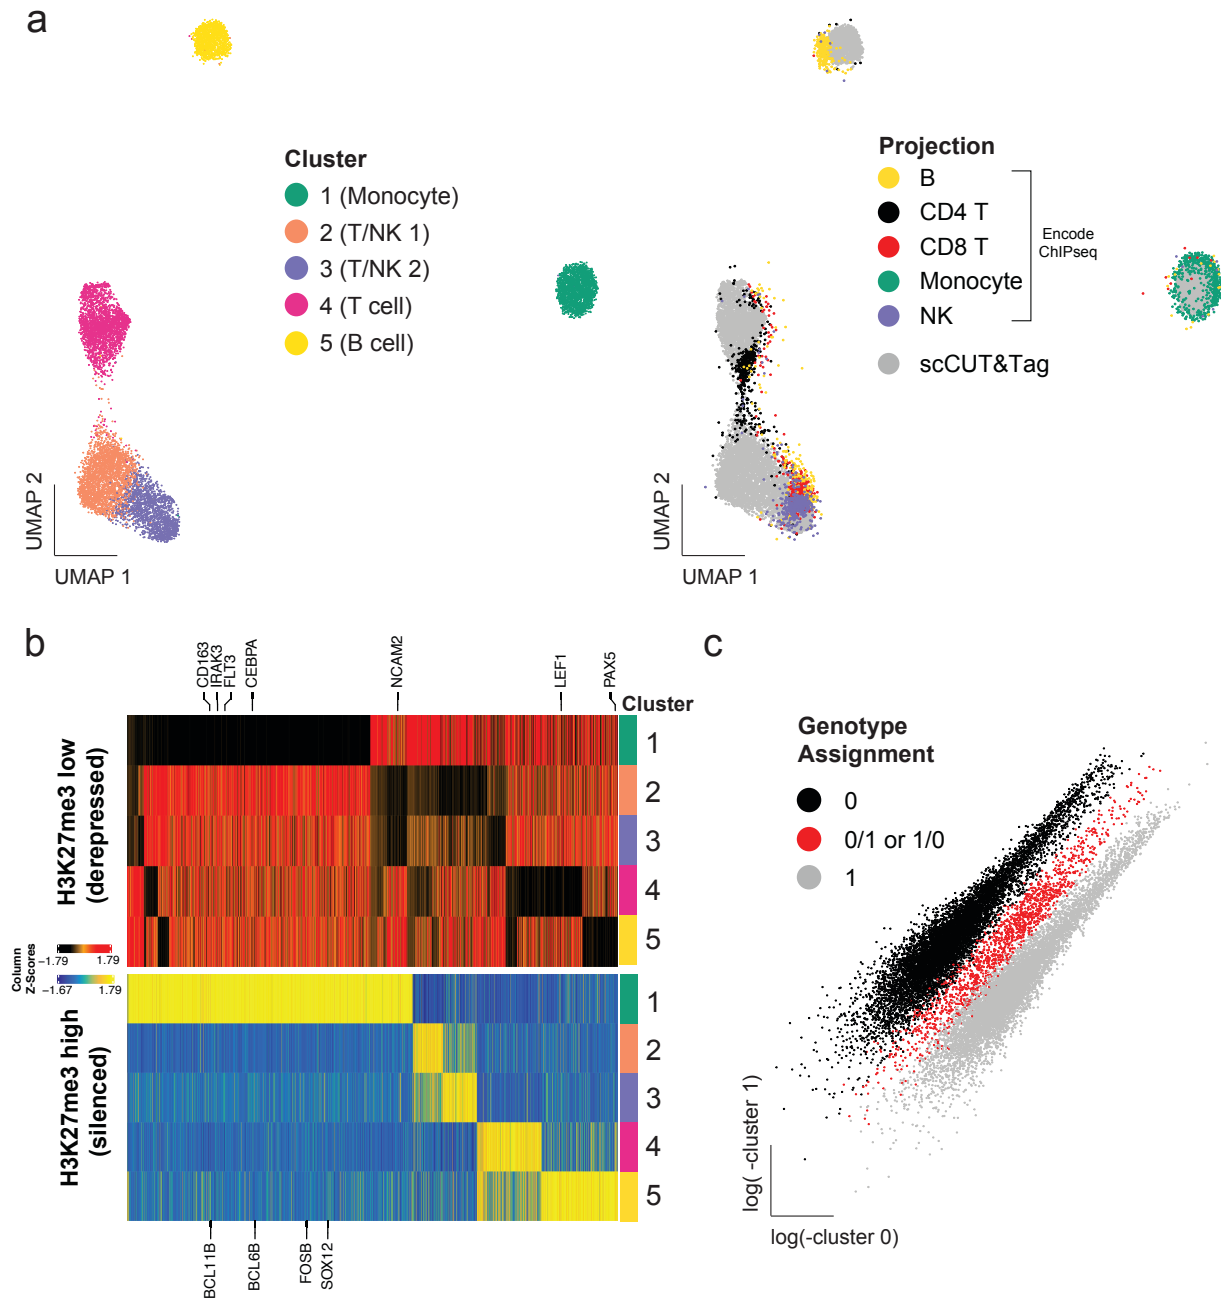

**Figure 2: scCUT&Tag for H3K27me3 readily identify major subtypes in PBMC**

a) Left - UMAP embedding of single cell data from PBMC. Unsupervised clustering revealed 5 clusters. Right - UMAP projection of downsampled ChIPseq bulk data from primary sorted bulk datasets for major PBMC cell-types (see Supplementary methods for GSE citations) on single cell CUT&Tag data on left. b) Heatmap of genes with significantly low (top) or high (bottom) H3K27me3 signal in each cluster (row). Fold change < -2 (top) or > 2 (bottom); q-value < 0.05 (both). Cell type specific genes are highlighted. c) Sparse mixture model clustering (using souporecell) of genotype variant calls from the PBMC data colored by genotype assignment (prior to multiplet removal).

99

100 landscapes across heterogeneous cell types within a sample, obviating the need for physical cell  
 101 sorting and minimizing confounding effects of batch effect, read depth, or sample heterogeneity  
 102 (Supplementary Fig. 3). This allowed us to identify the top differentially PcG-silenced loci across

103 the major cell types in PBMCs (Fig. 2b). We also profiled PBMCs with the active mark H3K27ac  
104 and recovered the major cell types in a similar proportion as H3K27me3 scCUT&Tag  
105 (Supplementary Fig. 4, Supplementary Table 1).

106 We next demultiplexed each biological donor using Souporcell. In brief, the algorithm identifies  
107 genotypic differences between single cells by variant calling aligned reads<sup>11</sup>. The variant calls  
108 can also be used to identify multiplets. Using this method we were able to differentiate cells from  
109 each donor (Fig. 2c). Clustering was not driven by donor specific effects but rather by cell type  
110 differences (Supplementary Fig. 3b).

111 Having established scCUT&Tag can profile developmental systems and heterogenous tissues,  
112 we used scCUT&Tag to interrogate PcG based clustering in glioblastoma (GBM), a human  
113 central nervous system tumor that is known to have a heterogeneous microenvironment<sup>12</sup>,  
114 exhibit intratumoral heterogeneity<sup>13</sup> and have pseudo-hierarchical organization that mimics  
115 development<sup>12, 14, 15</sup>. In this tumor type, changes in PcG chromatin silencing can mediate  
116 emergence of resistant cell populations<sup>16</sup>.

117 We profiled H3K27me3 in 1,311 single nuclei (3,643 median fragments/cell) using the 10X  
118 scCUT&Tag workflow from a primary glioblastoma which had been snap-frozen shortly after  
119 surgical removal. We distinguished four major cell populations within the sample (Fig. 3a). To  
120 annotate clusters, we constructed CSS of previously-defined marker loci<sup>12</sup>, and annotated  
121 clusters that correspond to microglia (Cluster 1, low CSS at the PTPRC gene), neurons (Cluster  
122 3, low CSS at RBFOX3), oligodendrocytes (Cluster 4, low CSS at MOBP), and other neural  
123 lineage cells, including tumor cells (Cluster 4, low CSS at SOX2) (Fig. 3b). To confirm cluster  
124 annotations, we projected CUT&RUN bulk data from a glioma stem cell line (UW7gsc) derived  
125 from the same patient, two established neural stem cell lines (U5 and CB660)<sup>17</sup>, and ENCODE<sup>18</sup>  
126 ChIP-seq bulk data for monocytes (proxy for microglia) and astrocytes. Projection onto the  
127 scCUT&Tag tumor sample embedding confirmed CSS annotations (Fig. 3c). UW7gsc projected  
128 to the center of the largest cluster, presumably made up of tumor cells. The astrocyte data  
129 projected to a smaller satellite cluster within the neural lineage cells. The neural stem cell line  
130 data localized to both the tumor cell cluster as well as the astrocyte cluster (Supplementary Fig.  
131 5). This may reflect spontaneous differentiation of neural stem cells towards the astrocyte  
132 lineage *in vitro* or reflect subtle changes in cell state such as lineage priming<sup>19</sup>.

133 To understand how the tumor changed with treatment, we performed scCUT&Tag profiling for  
134 H3K27me3 for a relapse sample obtained via rapid autopsy from the patient 5 months after

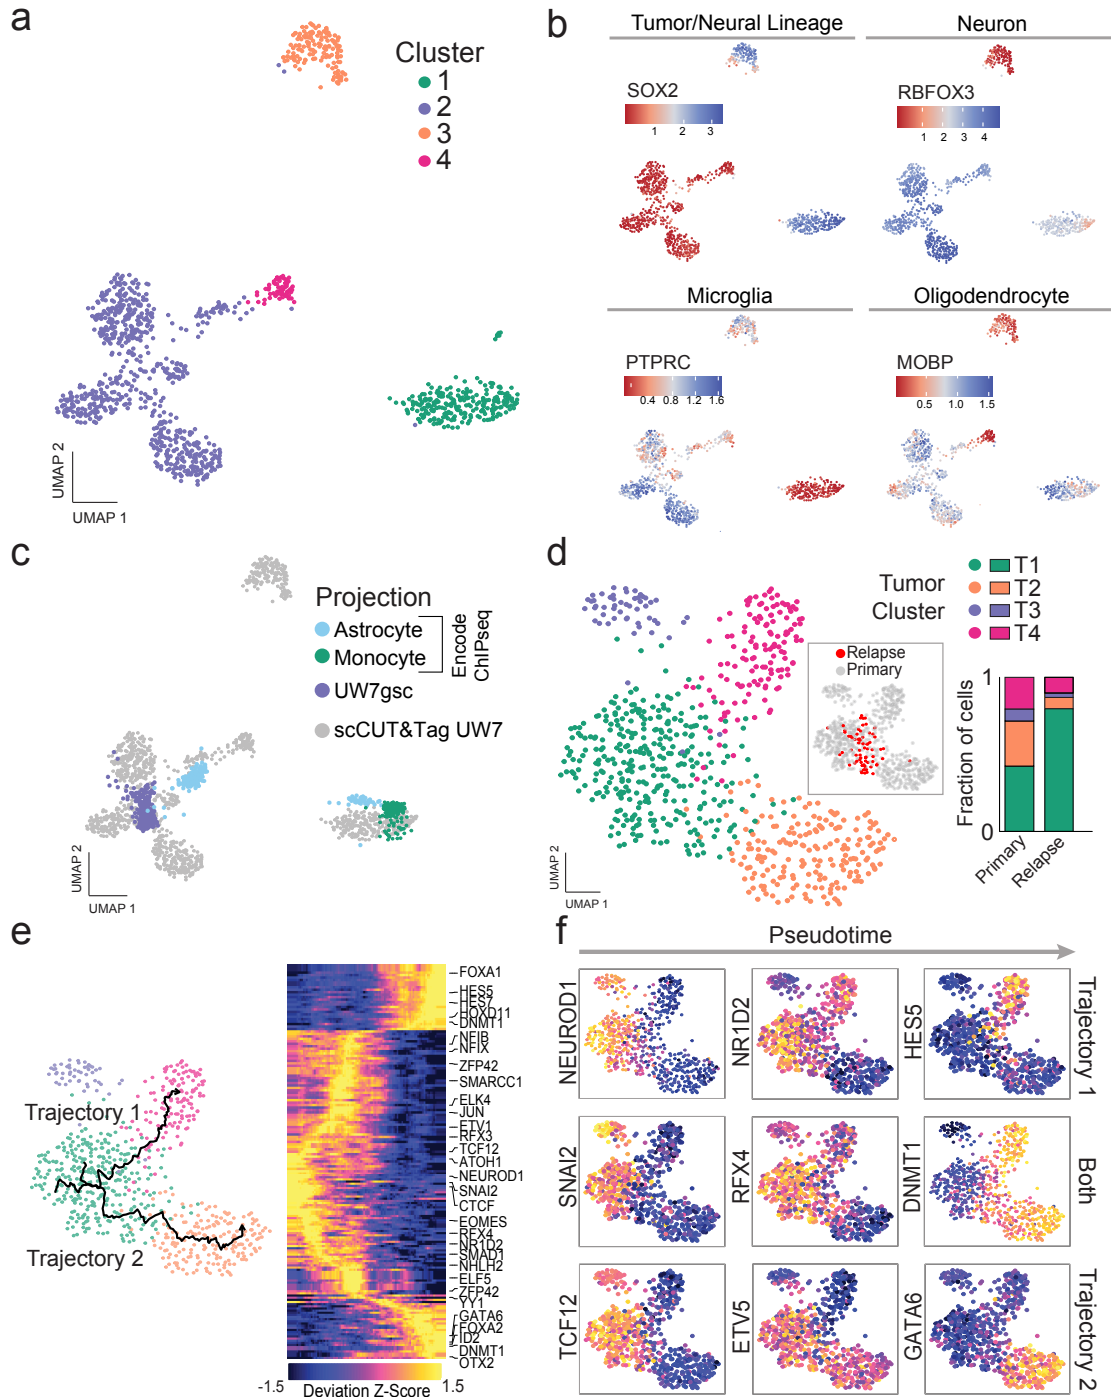

**Figure 3: scCUT&Tag data for H3K27me3 for a human glioblastoma primary and relapse sample demonstrates heterogeneity in PcG distribution within tumor cell clusters and cluster enrichment after treatment.**

a) UMAP embedding of single cells from a primary human glioblastoma based on H3K27me3 signal. b) Cluster annotation using chromatin silencing scores for key markers genes identifies microglia (PTPRC), neurons (RBFOX3), oligodendrocytes (MOBP), and tumor cells (SOX2). c) UMAP transform and projection of bulk ChIP seq (monocytes, astrocytes) or bulk Cut&Run (UW7gsc) onto patient sample. d) Left - UMAP co-embedding of tumor cells from primary and relapse sample. Inset highlights locations of cells from relapse sample. Right - Barplot demonstrating fraction of cells in each sample (Primary, Relapse) that belong to each cluster. e) Left - Two pseudotime trajectories starting with cluster T1 (presumed stem-like cluster) and ending in either cluster T4 (Trajectory 1) or cluster T2 (Trajectory 2). Right - Heatmap of 132 significant motif deviations based on H3K27me3 activity within peaks from aggregated tumor cell ATAC-seq data. Motif deviations are ordered by pseudotime. f) UMAP plots for tumor cells colored by deviation scores for selected motifs. Left column shows early motifs in pseudotime that are commonly silenced of cells in each sample (Primary, Relapse) that belong to each cluster. Middle column shows early silenced programs that diverge according to trajectory (NR1D2 in Trajectory 1 and ETV5 in Trajectory 2) or are common across trajectories (RFX4). Right column shows silenced programs specific to terminal pseudotime for Trajectory 1 (HES5), Trajectory 2 (GATA6) or both (DNMT1).

136 surgery and radiation therapy. Application of quality control metrics followed by low dimensional  
137 embedding identified 4 distinct cell types in the relapse sample (Supplementary Fig. 6a).  
138 Projection of the 1168 autopsy single cell profiles (16,232 median fragments/cell) onto the  
139 primary tumor UMAP embedding allowed cell type identification, including 71 cells that  
140 colocalized to the tumor cell cluster (Supplementary Fig. 6b).

141 We focused on the tumor cells, co-embedding the 71 relapse tumor single cells with the 640  
142 primary tumor single cells. After batch correction, we identified 4 clusters within the tumor cell  
143 data with distinct H3K27me3 profiles (Fig. 3d - left). Examining the distribution of cell states  
144 across the two timepoints, we noted an enrichment for Cluster T1 in the relapse specimen (Fig.  
145 3d - right). The relapse tumor cells had higher background signal when compared to the primary  
146 tumor cells as determined by FRiP analysis (Supplementary Fig. 6c). To further confirm that the  
147 relapse cells were most similar to Cluster T1, we characterized reads in relapse cells that were  
148 present in genomic regions that most significantly distinguished the primary tumor clusters  
149 (Supplementary Fig. 6d). This analysis confirmed similarity of the relapse tumor cells to Cluster  
150 T1. Gene set enrichment analysis using the CSS matrix identified potential programs silenced  
151 (positive enrichment scores) and derepressed (negative enrichment score) in this cluster.  
152 Interestingly, the Verhaak\_glioblastoma\_proneural gene set appears to be silenced in the  
153 resistant cell cluster (Supplementary Fig. 7), consistent with the idea that tumor evolution may  
154 induce a proneural-to-mesenchymal shift<sup>20</sup>. In contrast, low CSS was observed at  
155 gene sets with high CpG content that are marked by H3K27me3 in whole brain<sup>21</sup>. The lack of  
156 H3K27me3 signal in this tumor cluster suggests that the PcG landscape of glioblastoma cells  
157 resembles a stem-like state rather than a terminally differentiated state<sup>22</sup>.

158 We next wanted to understand the relationship between the cell clusters. Clusters T1, T2 and  
159 T4 exist along a continuum, whereas cluster T3 is separated from the main tumor cell group.  
160 We focused on whether transcription factor programs are differentially silenced across clusters  
161 T1, T2, and T4. H3K27me3 domains are broad, spanning 10-100kb and covering many genes,  
162 enhancers, promoters, and intervening regions. Therefore, to limit motif searching to potential  
163 regulatory elements within H3K27me3 domains, we used single-cell ATAC-seq data  
164 (Supplementary. Fig 8) to annotate enhancers and promoters in tumor cell sub-clusters based  
165 on accessible chromatin. We then calculated TF motif enrichments and depletions in this set of  
166 curated genomic regions based on H3K27me3 signal. We examined motif deviations ordered  
167 over two pseudotime trajectories that started with cluster T1 (presumed stem-like cluster) and  
168 ended in either cluster T4 (Trajectory 1) or cluster T2 (Trajectory 2) (Fig. 3e - left). Motif



169 deviations (n=132) were ordered according to pseudotime, identifying silenced motifs that  
170 spanned cluster T1 to cluster T2 and cluster T4 (Fig. 3e - right). At the apex of the trajectories,  
171 motif silencing was shared and included motifs for TFs such as NEUROD1, SNAI2, and TCF12  
172 (Fig. 3f, left column). At intermediate pseudotime points, there were silenced motifs specific to  
173 Trajectory 1 (NR1DA2) or Trajectory 2 (ETV5) or shared by both (RFX4) (Fig. 3f, middle  
174 column). As pseudotime proceeds, Trajectory 1 showed evidence of HES5 motif silencing, while  
175 Trajectory 2 showed GATA6 motif silencing. Interestingly, the DNMT1 motif was strongly  
176 silenced across both pseudotime endpoints, concordant with the idea that PcG silencing of  
177 DNMT1 enriched promoters and enhancers is a common feature of differentiation<sup>23</sup> (Fig. 3f,  
178 right column).

179 Fundamentally, we have shown here that repressive chromatin can be used to identify cell  
180 states *a priori* from heterogeneous normal and diseased tissues. This approach has far reaching  
181 applications, including generation of cell type specific chromatin atlases from archival tissue in a  
182 manner that does not require sorting of pure populations. We focused here primarily on a single  
183 chromatin mark, but this method can in theory be applied to any histone modification or DNA  
184 binding protein for which an antibody is available. As such, developing complete chromatin  
185 landscapes of complex tissues and disease states using scCUT&Tag will help decode the  
186 complex epigenetic machinery underlying gene expression. Broadly, our method for performing  
187 histone mark specific single-cell analysis adds to the growing list of single-cell 'omic' methods  
188 that can be used to understand heterogeneous cell populations.

## 189 **Materials & Methods**

### 190 *Biological Material*

191 H1 ES cells were purchased from WiCell (Cat#WA01-lot#WB35186). We used the following  
192 antibodies: Guinea Pig anti-Rabbit IgG (Heavy & Light Chain) antibody (Antibodies-Online  
193 ABIN101961), H3K27me3 (Cell Signaling Technology, cat #9733), H3K27ac (Millipore Sigma,  
194 cat# MABE647), SOX17 (R&D Systems, AF1924, Lot KGA0916121), OCT4 (Abcam, ab109183,  
195 lot gr120970-6), and H3K4me2 (Upstate 07-030, Lot 26335) The fusion enzyme, pA-Tn5 was  
196 generated as previously described<sup>3</sup>.

### 197 *hESC culture conditions*

198 H1 ES cells were maintained on Corning Matrigel hESC-qualified Matrix, Corning (#354277), at  
199 37C in mTeSR™ 1 from STEMCELL Technologies (Catalog #85850) with daily media

200 replacement. When cell aggregates were 80% confluent, they were released using ReLeSR,  
201 STEMCELL Technologies (# 05872), per manufacturer's instructions and incubated at 37°C for  
202 3-5 minutes. Cells were released into a small volume of complete media by tapping of growth  
203 plate and aggregates reduced in size by gentle pipetting and passaged to desired ratio.

#### 204 *hESC differentiation protocol*

205 hESC were differentiated to definitive endoderm using the STEMdiff Definitive Endoderm Kit  
206 (cat #05110). The full protocol is available from STEMCELL Tech  
207 ([https://cdn.stemcell.com/media/files/pis/29550-](https://cdn.stemcell.com/media/files/pis/29550-PIS_2_1_0.pdf?_ga=2.73376023.564267965.1597964514-138601152.1597964514)  
208 [PIS\\_2\\_1\\_0.pdf?\\_ga=2.73376023.564267965.1597964514-138601152.1597964514](https://cdn.stemcell.com/media/files/pis/29550-PIS_2_1_0.pdf?_ga=2.73376023.564267965.1597964514-138601152.1597964514)). Briefly, hESC at  
209 80% confluent were harvested using Gentle Cell Dissociation Reagent (STEMCELL Tech, cat  
210 #07174) and reseeded in a single-cell manner on Matrigel-plates. This was done daily for five  
211 days. Every 24 hours after a new differentiation culture was started and cells were incubated  
212 with DE differentiation medium according to the manufacture's guideline. On the 5<sup>th</sup> day, all five  
213 timepoints were harvested simultaneously using Accutase (STEMCELL Tech, cat# AT104-500).  
214 Immunofluorescence was used to confirm differentiation as previously described<sup>24</sup>.

#### 215 *PBMC acquisition and processing*

216 Healthy adult donors at the University of Washington underwent venipuncture and blood was  
217 collected using heparin-containing vacutainer tubes after consenting to participate in our study,  
218 Institutional Review Board protocol (#STUDY00008678). Additional PBMC specimens were  
219 obtained from consented donors at the Fred Hutchinson Cancer Research Center (IRB#  
220 0999.209). Mononuclear cells were harvested from peripheral blood using gradient  
221 centrifugation. Cells were then washed twice with PBS and captured as outlined below.

#### 222 *Brain tumor specimen acquisition, processing and culture*

223 Adult patients at the University of Washington provided preoperative informed consent to take  
224 part in the study in all cases following approved Institutional Review Board protocols (IRB  
225 protocol #STUDY00002162). Fresh tumors were collected directly from the operating room at  
226 the time of surgery and either taken fresh or snap frozen immediately after removal in liquid  
227 nitrogen. Histopathologic diagnosis was confirmed by a board certified neuropathologist. Fresh  
228 tissue was enzymatically dissociated using a papain-based brain tumor dissociation kit (Miltenyi  
229 Biotec) as per manufacturer's protocol. Cells were then cultured on laminin coated plates in  
230 DMEM/F12 supplemented with 1X N2/B27, 1% Penicillin/Streptomycin. Cultures were passaged

231 as needed when confluent and considered stable after 3 serial passages. Cell line UW7gsc was  
232 used for this study at passage number 3. Autopsy tissue was collected with a post-mortem  
233 interval of approximately 8.75 hours after informed consent with a waiver from the University of  
234 Washington IRB. Tissue was snap frozen in liquid-nitrogen cooled isopentane. Tumor regions  
235 were sampled based on gross examination of brain sections and processed as outlined below.

#### 236 *Nuclei preparation from brain tumor specimens*

237 Frozen tissue was processed to nuclei using the 'Frankenstein' protocol from Protocols.io.  
238 Briefly, snap frozen tissue glioblastoma tissue was thawed on ice and minced sharply into <1  
239 mm pieces. 500 ul chilled Nuclei EZ Lysis Buffer (Millipore Sigma NUC-101 #N3408) was added  
240 and tissue was homogenized 10-20 times in a Dounce homogenizer. The homogenate was  
241 transferred to a 1.5 ml Eppendorf tube and 1 mL chilled Nuclei EZ Lysis Buffer was added. The  
242 homogenate was mixed gently with a wide bore pipette and incubated for 5 minutes on ice. The  
243 homogenate was then filtered through a 70 um mesh strainer and centrifuged at 500g for 5  
244 minutes at 4°C. Supernatant was removed and nuclei were resuspended in 1.5 mL Nuclei EZ  
245 lysis buffer and incubated for 5 minutes on ice. Nuclei were centrifuged at 500g for 5 min at 4°C.  
246 After carefully removing the supernatant (pellet may be loose), nuclei were washed in Wash  
247 Buffer (1x PBS, 1.0% BSA, 0.2 U/μl RNase Inhibitor). Nuclei were then centrifuged and  
248 resuspended in 1.4 ml Wash Buffer for two additional washes. Nuclei were then filtered through  
249 a 40 um mesh strainer. Intact nuclei were counted after counterstaining with Trypan blue in a  
250 standard cell counter.

#### 251 *Chromatin Profiling: scCUT&Tag using the ICELL8 system/protocol*

252 scCUT&Tag for the ICELL8 was carried out as previously described<sup>3</sup>. In brief, approximately  
253 250,000 hESC (for each timepoint) were processed by centrifugation between buffer exchanges  
254 at 600xg for 3 minutes and in low-retention tubes. Cells were collected and washed with 1mL  
255 wash buffer (20 mM HEPES, pH 7.5; 150 mM NaCl; 0.5 mM Spermidine, 1× Protease inhibitor  
256 cocktail) at room temperature. Cells were incubated antibody diluted 1:50 in NP40-Digitonin  
257 Wash Buffer (0.01% NP40, 0.01% Digitonin in wash buffer) overnight. This wash buffer  
258 permeabilized the cells and released nuclei. Permeabilized nuclei were then rinsed once with  
259 NP40-Digitonin Wash buffer and incubated with anti-Rabbit IgG antibody (1:50 dilution) in 1 mL  
260 of NP40-Digitonin Wash buffer on a rotator at room temperature for 30 min. Nuclei were washed  
261 twice with NP40-Digitonin Wash buffer and incubated with 1:100 dilution of pA-Tn5 in NP40-Dig-  
262 med-buffer (0.01% NP40, 0.01% Digitonin, 20 mM HEPES, pH 7.5, 300 mM NaCl, 0.5 mM

263 Spermidine, 1× Protease inhibitor cocktail) for one hour at RT on a rotator. Cells were washed  
264 2x with NP40-Dig-med-buffer and resuspended in 150 µL Tagmentation buffer (10 mM MgCl<sub>2</sub> in  
265 NP40-Dig-med-buffer) and incubated at 37 °C for 1 h. Tagmentation was stopped by adding  
266 50 µL of 4× Stop Buffer (40.4 mM EDTA and 2 mg/mL DAPI) and the sample was held on ice for  
267 30 min. Samples were then strained through a 10-micron cell strainer to remove clumps of cells.

268 The SMARTer ICELL8 single-cell system (Takara Bio USA, Cat. #640000) was used to array  
269 single cells previously described<sup>3</sup>. Briefly, cells were loaded onto a source plate and dispensed  
270 in to a SMARTer ICELL8 350 v chip (Takara Bio USA, Cat. # 640019) at 35 nanoliter per well.  
271 The chip was then spun down at 300xg for 5 minutes. Imaging on a DAPI-channel confirmed the  
272 presence of single-cells in specific wells. Non-single cell wells were excluded from downstream  
273 reagent dispenses. To index the whole chip, 72x72 i5/i7 unique indices (5184 micro-wells total)  
274 were dispensed at 35nL in wells that contained single cells followed by two dispenses of 50nL  
275 (100nL total) 2x NEBNext High-Fidelity 2X PCR Master Mix (NEB, M0541L). The chip was  
276 sealed and spun down at 2250xg for 3 mins after each dispense. The PCR on the chip was  
277 performed with the following protocol: 5 min at 72 °C and 2 min at 98 °C followed by 15 cycles of  
278 10 s at 98 °C, 30 s at 60 °C, and 5 s at 72 °C, with a final extension at 72 °C for 1 min.

#### 279 *Quality Control (ICELL8):*

280 The ICELL8 has a built-in imaging system which filters out wells that do not contain a single cell.  
281 Thus, empty wells without cells, with more than one single cell, and with doublets, are removed.  
282 Subsequently, we filtered single cells with fewer than 100 unique fragments to remove spurious  
283 barcodes that can be attributed to an overflow of dispensed PCR material.

284 A drawback of leveraging a hyperactive transposon in a fusion enzyme to target specific  
285 chromatin compartments is that the Tn5 has a high binding affinity for accessible chromatin, the  
286 basis of ATAC-seq. Previously, it was shown that this artifact is highly dependent on the  
287 concentration of salt in subsequent washes post fusion enzyme binding<sup>3</sup>. To identify whether  
288 our single-cell samples exhibited this artifact, we mapped the percent of reads in each single  
289 cell that fell into H3K27me<sub>3</sub>, H3K4me<sub>2</sub>, or ATAC specific peaks (Supplementary Fig. 1c). The  
290 degree in which repressive H3K27me<sub>3</sub> marked chromatin and active accessible chromatin  
291 ATAC-seq signal overlapped was minimal as expected whereas an active mark, H3K4me<sub>2</sub>, had  
292 a higher degree of overlap with ATAC-seq data. Correlations of aggregate versus bulk profiles  
293 across the 5 kb genome tiles show similar results (Supplementary Fig. 1b).

294 As an initial test, we wanted to evaluate the robustness of scCUT&Tag by comparing it to  
295 scATAC-seq. Therefore, we chose the histone modification K4me2 which was shown to provide  
296 similar output to ATAC-seq. A representative genomic track comparing bulk, aggregate, and  
297 single cell profiles for K4me2 in H1 and K562 cells, reveal the high-quality resulting data  
298 (Supplementary Fig 1a). A low-dimensional embedding, UMAP, clearly separate K562 cells  
299 (n=807) from hESC (n=317) (Supplementary Fig. 1d). Projections of published scATAC-seq  
300 data (GSE99172) onto our scCUT&Tag embedding align with cell-type specific clusters  
301 (Supplementary Fig. 1e).

### 302 *Chromatin Profiling: scCUT&Tag using the 10X Genomics system*

303 CUT&Tag was performed with an anti-H3K27me3 antibody (CST#9733) or anti-H3K27ac  
304 (MABE647) with 1 million cells as published<sup>3</sup>. Adaptation to the 10X workflow was performed as  
305 follows: For all samples except PBMC mixing experiment, the nuclei were spun down at 600g  
306 for 3 minutes after the pA-Tn5 binding step. After counting, they were resuspended in 1X  
307 Diluted Nuclei Buffer at 2500 nuclei/ul. The nuclei were then prepared for transposition per as  
308 per the 10X genomics single cell ATAC-seq protocol  
309 (SingleCell\_ATAC\_ReagentKits\_v1.1\_UserGuide\_RevD). All steps beginning with 1.1 'Prepare  
310 Transposition Mix' were performed according to 10X Genomics standard protocol. Libraries  
311 were sequenced using an Illumina NovaSeq 6000.

312 For PBMC mixing experiment, the nuclei were tagmented in high salt (300 mM) as per  
313 published protocol<sup>3</sup>. After tagmentation, bovine serum albumin was added to a final  
314 concentration of 1%, nuclei were centrifuged at 600 g for 3 mins and then resuspended in 1X  
315 Diluted Nuclei Buffer (10X Genomics, PN-2000207) at 2500 nuclei/ $\mu$ L. The 10X genomics single  
316 cell ATAC-seq protocol (SingleCell\_ATAC\_ReagentKits\_v1.1\_UserGuide\_RevD) was used with  
317 the following modifications. For step 1.1 'Prepare Transposition Mix', 7  $\mu$ l ATAC buffer, 3  $\mu$ l low  
318 TE buffer (10 mM Tris pH 8.0, 0.1 mM EDTA) and 5  $\mu$ l stock nuclei solution were mixed  
319 together, omitting the ATAC enzyme as tagmentation had already been performed. All  
320 remaining steps beginning with Step 2.0 'GEM generation and barcoding' were performed  
321 according to 10X Genomics standard protocol. Libraries were sequenced using an Illumina  
322 NovaSeq 6000.

### 323 *Data processing*

324 Illumina .bcl files were demultiplexed and converted to fastq format using the cellranger mkfastq  
325 function. Resulting fastq files were aligned to the hg38 genome, filtered for duplicates and

326 counted using cellranger atac. An output BED file of filtered fragment data containing the cell  
327 barcode was then read into ArchR<sup>7</sup> as fragment counts in 5kb genome windows which was used  
328 in all dimensionality reduction steps across all experiments. We used the ArchR<sup>7</sup> gene activity  
329 score to calculate our CSS as described above. We used LSI dimensionality reduction<sup>7</sup> using a  
330 TFIDF normalization function<sup>25</sup>, UMAP<sup>26</sup> low dimensional embedding, and clustering using a  
331 nearest neighbor graph<sup>25</sup> performed on data in LSI space.

332 As the cell line/differentiation experiments used the ICELL8 platform, we did not remove  
333 multiplets as this platform uses microscopic imaging to ensure single-cell capture. For droplet  
334 partitioning data, we used the following methods to ensure data quality: 1) We first visualized  
335 fragment length distribution across clusters. We identified 3 clusters with nucleosomal banding  
336 distribution that was consistent with untethered transposition events (Supplementary Fig 3b). 2)  
337 We then removed two clusters with high mean fragment counts. 3) We iteratively removed  
338 clusters which exhibited non-specific CSS. We accomplished this by calculating CSS  
339 significance across clusters using ArchR<sup>7</sup>. Any cluster that did not have any genes that were  
340 significantly over-represented or under-represented using significance thresholds of  $fdr < 0.01$   
341 and absolute fold-change  $> 3$  was removed. Bulk projection of down-sampled ChIP-seq data  
342 was performed as follows. Raw sequence data aligned to hg38 (BAM files) were downloaded  
343 from ENCODE<sup>18</sup>. Data was processed using ChomVAR<sup>27</sup> by counting reads in 5kb tiled  
344 genomes and subsequently used in the bulk projection function in ArchR. Single cell projection  
345 was performed using a modified ArchR projection function which did not perform any  
346 manipulation of the input data prior to projection. Marker regions/genes for each group were  
347 calculated using the getMarkerFeatures function in ArchR. Preranked GSEA (fgsea<sup>28</sup>) was  
348 performed using the entire list of marker genes ranked by  $-\log_{10}(pvalue)/\text{sign}(foldchange)$  with  
349 the complete MSigDB<sup>29</sup> set of gene lists. Peak set from scATAC-seq data (see below) was used  
350 as a custom annotation set and motif deviations were calculated using addDeviationsMatrix  
351 function in ArchR. Pseudotime trajectory was assigned with T1 as a root and Clusters T2 and  
352 T4 as an endpoint.

353 To perform variant calling, we first merged bam output from cellranger-atac using a custom  
354 script (<https://github.com/scfurl/mergeBams>). We then used souporecell<sup>11</sup> on the merged bam  
355 invoking the 'no\_umi' and 'skip\_remap' options. Sparse mixture model output from souporecell  
356 was log-normalized and colored by the genotype assignment.

357 *Quality control and data processing for brain tumor ATAC-seq*

358 Nuclei preparation from snap frozen brain tumor tissue was performed as described above and  
359 standard single cell ATAC-seq workflow was performed as per manufacturer guidelines (10X  
360 Genomics). Sequencing data was processed using the cell ranger atac package. An output BED  
361 file of filtered fragment data containing the cell barcode was then read into ArchR<sup>7</sup> using 500 bp  
362 genome windows. We used LSI dimensionality reduction<sup>7</sup> using a TFIDF normalization  
363 function<sup>25</sup>, UMAP<sup>26</sup> low dimensional embedding, and clustering using a nearest neighbor  
364 graph<sup>25</sup> performed on data in LSI space. Tumor cells were identified as the largest cluster  
365 containing high gene activity scores for marker genes SOX2 and PTPRZ1. This cluster was  
366 used for peak calling using the MACS2 wrapper in ArchR with standard parameters.

### 367 *External Data*

368 Data from the following identifiers were downloaded from the ENCODE portal  
369 (<https://www.encodeproject.org>) and Gene Expression Omnibus  
370 (<https://www.ncbi.nlm.nih.gov/geo/>). For figure 1b and supplementary figure 1a, 1f, and 1g:  
371 GSE124557. For figure 1d and supplementary figure 2c: GSE75748. In addition, for the  
372 purposes of this study hESC differentiated timepoint 1.5 (scRNA-seq) is approximated to be day  
373 2 in the GSE75748 dataset. For supplementary figure 2b, 2c, and 2e: GSE99172, GSE99173,  
374 GSE124557, and GSE85330. For figure 2b: ENCSR000ASK, ENCSR043SBG,  
375 ENCSR103GGR, ENCSR404MOX, and ENCSR939JZW. For figure 3c, the following data sets  
376 were used: ENCFF363TCY, ENCFF911MNN.

### 377 **Data Availability**

378 Sequencing data are deposited in the Gene Expression Omnibus (GEO) with accession code  
379 (pending). There are no restrictions on data use.

### 380 **Code Availability**

381 Code used in this study can be found on Github at <https://github.com/Henikoff/scCUT-Tag>.

### 382 **Acknowledgements**

383 We thank Eric Holland and members of the Holland lab for providing shared space for  
384 experimental work. We also thank Michael Meers, Derek Janssens, Manu Setty, Jitendra  
385 Thakur, and other members of the Henikoff lab for helpful suggestions, discussions, and  
386 mentorship. We thank BioRender helping us create figures. This work was supported by the  
387 Howard Hughes Medical Institute (S.H.), grants R01 HG010492 (S.H.) and R01 GM108699  
388 (K.A.) and K08 CA245037 (P.J.C.) from the National Institutes of Health, an HCA Seed Network

389 grant from the Chan-Zuckerberg Initiative (S.H., A.P.P, S.N.F, R.G., K.A., Y.Z.), a Burroughs  
390 Wellcome Career Award for Medical Scientists (A.P.P) and an American Cancer Society  
391 Mentored Scholar Award (S.N.F).

### 392 **Author Contributions**

393 S.J.W, S.N.F, A.B.M, H.K-O, A.H.F, S.N.E, and J.F.S processed samples and performed  
394 experiments. S.J.W, S.N.F, Y.Z., R.G and A.P.P performed and/or provided input on data  
395 processing and analysis. K.C, P.J.C, and C.D.K provided access to tissue samples and assisted  
396 with processing. S.J.W, S.N.F, K.A., S.H, and A.P.P wrote the manuscript with input from all  
397 authors.

### 398 **Competing Interests**

399 S.N.F has received research support from Lyell Immunopharma. R.G. has received consulting  
400 income from Juno Therapeutics, Takeda, Infotech Soft, Celgene, Merck and has received  
401 research support from Janssen Pharmaceuticals and Juno Therapeutics, and declares  
402 ownership in CellSpace Biosciences. H.S.K and S.H have filed patent applications related to  
403 this work.

### 404 **References**

- 405 1. Tanay, A. & Regev, A. Scaling single-cell genomics from phenomenology to mechanism.  
406 *Nature* **541**, 331-338 (2017).
- 407 2. Klemm, S.L., Shipony, Z. & Greenleaf, W.J. Chromatin accessibility and the regulatory  
408 epigenome. *Nature Reviews Genetics* **20**, 207-220 (2019).
- 409 3. Kaya-Okur, H.S. et al. CUT&Tag for efficient epigenomic profiling of small samples and  
410 single cells. *Nature Communications* **10** (2019).
- 411 4. Lee, T.I. et al. Control of Developmental Regulators by Polycomb in Human Embryonic  
412 Stem Cells. *Cell* **125**, 301-313 (2006).
- 413 5. Laugesen, A. & Helin, K. Chromatin Repressive Complexes in Stem Cells, Development,  
414 and Cancer. *Cell Stem Cell* **14**, 735-751 (2014).
- 415 6. Sparmann, A. & Van Lohuizen, M. Polycomb silencers control cell fate, development and  
416 cancer. *Nature Reviews Cancer* **6**, 846-856 (2006).
- 417 7. Granja, J.M. et al. ArchR: An integrative and scalable software package for single-cell  
418 chromatin accessibility analysis. *bioRxiv*, 2020.2004.2028.066498 (2020).
- 419 8. Hawkins, R.D. et al. Distinct epigenomic landscapes of pluripotent and lineage-  
420 committed human cells. *Cell stem cell* **6**, 479-491 (2010).
- 421 9. Chu, L.-F. et al. Single-cell RNA-seq reveals novel regulators of human embryonic stem  
422 cell differentiation to definitive endoderm. *Genome Biology* **17**, 173 (2016).
- 423 10. Granja, J.M. et al. Single-cell multiomic analysis identifies regulatory programs in mixed-  
424 phenotype acute leukemia. *Nat Biotechnol* **37**, 1458-1465 (2019).
- 425 11. Heaton, H. et al. Souporecell: robust clustering of single-cell RNA-seq data by genotype  
426 without reference genotypes. *Nat Methods* **17**, 615-620 (2020).



- 427 12. Bhaduri, A. et al. Outer Radial Glia-like Cancer Stem Cells Contribute to Heterogeneity  
428 of Glioblastoma. *Cell Stem Cell* **26**, 48-63.e46 (2020).
- 429 13. Patel, A.P. et al. Single-cell RNA-seq highlights intratumoral heterogeneity in primary  
430 glioblastoma. *Science (New York, N.Y.)* **344**, 1396-1401 (2014).
- 431 14. Couturier, C.P. et al. Single-cell RNA-seq reveals that glioblastoma recapitulates a  
432 normal neurodevelopmental hierarchy. *Nature Communications* **11** (2020).
- 433 15. Wang, Q. et al. Tumor Evolution of Glioma-Intrinsic Gene Expression Subtypes  
434 Associates with Immunological Changes in the Microenvironment. *Cancer Cell* **32**, 42-  
435 56.e46 (2017).
- 436 16. Liao, B.B. et al. Adaptive Chromatin Remodeling Drives Glioblastoma Stem Cell  
437 Plasticity and Drug Tolerance. *Cell Stem Cell* (2016).
- 438 17. Janssens, D.H. et al. Automated in situ chromatin profiling efficiently resolves cell types  
439 and gene regulatory programs. *Epigenetics & Chromatin* **11** (2018).
- 440 18. An integrated encyclopedia of DNA elements in the human genome. *Nature* **489**, 57-74  
441 (2012).
- 442 19. Llorens-Bobadilla, E. et al. Single-Cell Transcriptomics Reveals a Population of Dormant  
443 Neural Stem Cells that Become Activated upon Brain Injury. *Cell Stem Cell* **17**, 329-340  
444 (2015).
- 445 20. Segerman, A. et al. Clonal Variation in Drug and Radiation Response among Glioma-  
446 Initiating Cells Is Linked to Proneural-Mesenchymal Transition. *Cell Reports* **17**, 2994-  
447 3009 (2016).
- 448 21. Meissner, A. et al. Genome-scale DNA methylation maps of pluripotent and  
449 differentiated cells. *Nature* **454**, 766-770 (2008).
- 450 22. Rheinbay, E. et al. An Aberrant Transcription Factor Network Essential for Wnt Signaling  
451 and Stem Cell Maintenance in Glioblastoma. *Cell Reports* **3**, 1567-1579 (2013).
- 452 23. O'Neill, K.M. et al. Depletion of DNMT1 in differentiated human cells highlights key  
453 classes of sensitive genes and an interplay with polycomb repression. *Epigenetics &*  
454 *Chromatin* **11**, 12 (2018).
- 455 24. Meers, M.P., Janssens, D.H. & Henikoff, S. Pioneer Factor-Nucleosome Binding Events  
456 during Differentiation Are Motif Encoded. *Mol Cell* **75**, 562-575.e565 (2019).
- 457 25. Stuart, T. et al. Comprehensive Integration of Single-Cell Data. *Cell* **177**, 1888-1902  
458 e1821 (2019).
- 459 26. Becht, E. et al. Dimensionality reduction for visualizing single-cell data using UMAP. *Nat*  
460 *Biotechnol* (2018).
- 461 27. Schep, A.N., Wu, B., Buenrostro, J.D. & Greenleaf, W.J. chromVAR: inferring  
462 transcription-factor-associated accessibility from single-cell epigenomic data. *Nat*  
463 *Methods* **14**, 975-978 (2017).
- 464 28. Sergushichev, A.A. An algorithm for fast preranked gene set enrichment analysis using  
465 cumulative statistic calculation. *bioRxiv*, 060012 (2016).
- 466 29. Liberzon, A. et al. Molecular signatures database (MSigDB) 3.0. *Bioinformatics* **27**,  
467 1739-1740 (2011).

468
